# Supplementary material for: Metarhizium Anisopliae Challenges Immunity and Demography of Plutella xylostella
Source: PubMed Central journal article supplement (PMC7600445; doi:10.3390/insects11100694), 2020-10-13
Supplement: insects-11-00694-s001.pdf [file insects-11-00694-s001.pdf]

## Supplementary Material

**Supplementary Table 1. Primers used in this study**

| Name            |   | Primer sequences          |
|-----------------|---|---------------------------|
| <i>β-actin</i>  | F | GGAACGATACAGAGAAGATTA     |
|                 | R | TGGAACGCTTCACGAATTTGCG    |
| <i>Cecropin</i> | F | GTCGTGGCCATATGCTGTGT      |
|                 | R | GTCGTCCGACAAGCATCCAG      |
| <i>Lysozyme</i> | F | GCGAGTTGATAACTGACGACAT    |
|                 | R | GGCACTTGTTCTTCCATCCATA    |
| <i>Hemolin</i>  | F | AATAGAAGCTACCACAACGCCAGAG |
|                 | R | TAACGCAGATGCCGTAAGTGTAACC |
| <i>Spaetzle</i> | F | CCAACAGCATCATACCGAGC      |
|                 | R | TCCTGACATCGGCTTCCAAT      |
| <i>Defensin</i> | F | ACAGGAGACAGTGGTTGAGGAGTC  |
|                 | R | TTGTATCTTCAGTGCGTCTTCGTAC |

F' = Forward, R' Reverse

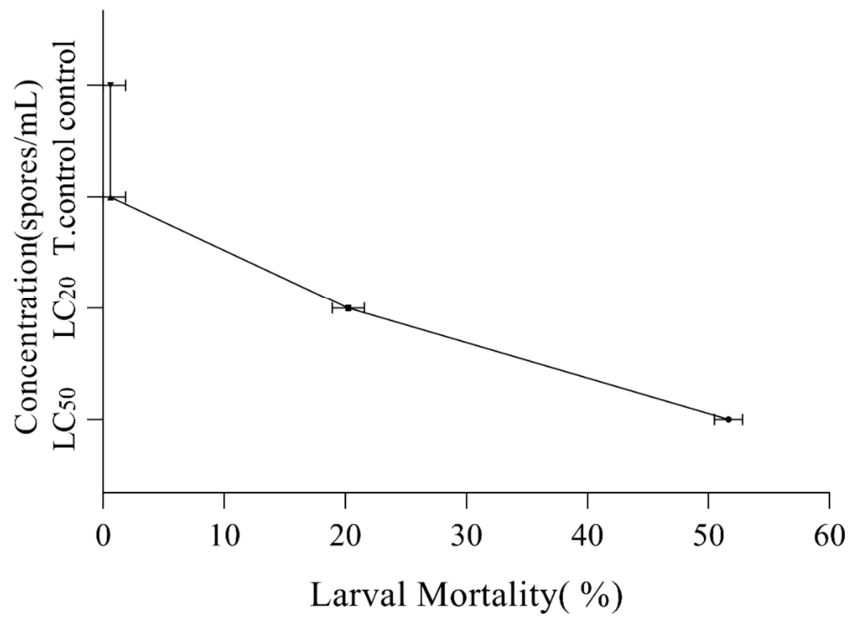

**Supplementary Figure 1: Experimental validation of lethal (LC<sub>50</sub>) and sublethal (LC<sub>20</sub>) concentrations of *Metarhizium anisopliae*.** Error bars show 95% confidence intervals (CI).
